# Supplementary material for: Pharmacokinetic and pharmacodynamic profile of the sodium‐glucose co‐transporter‐2 inhibitor empagliflozin in young people with Type 2 diabetes: a randomized trial
Source: PubMed Central journal article supplement — Diabet Med. 2018 May 6;35(8):1096–104. doi: 10.1111/dme.13629 (PMC6099360; doi:10.1111/dme.13629), 2018-05-06
Supplement: DME-35-1096-s005.pdf [file DME-35-1096-s005.pdf]

**Supplementary Table 1** Arithmetic mean values of pharmacokinetic parameters of empagliflozin

5mg in plasma: Comparison of the results of the main analysis and sensitivity analysis.

|                                               | Main analysis<br>(N=9) |           | Sensitivity analysis<br>(N=9) |           | Ratio of main analysis<br>versus sensitivity<br>analysis |
|-----------------------------------------------|------------------------|-----------|-------------------------------|-----------|----------------------------------------------------------|
|                                               | Mean                   | %CV       | Mean                          | %CV       |                                                          |
| AUC <sub>0-∞</sub> [nmol·h·l <sup>-1</sup> ]  | 1270                   | 51.9      | 1080                          | 30.4      | 1.18                                                     |
| AUC <sub>0-tz</sub> [nmol·h·l <sup>-1</sup> ] | 1240                   | 54.2      | 1040                          | 32.0      | 1.19                                                     |
| AUC <sub>0-24</sub> [nmol·h·l <sup>-1</sup> ] | 1110                   | 42.7      | 981                           | 28.6      | 1.13                                                     |
| C <sub>max</sub> [nmol·l <sup>-1</sup> ]      | 175                    | 54.2      | 147                           | 21.5      | 1.19                                                     |
| t <sub>max</sub> * [h]                        | 1.50                   | 0.95–7.92 | 1.05                          | 0.50–4.00 | na <sup>†</sup>                                          |
| t <sub>1/2</sub> [h]                          | 7.03                   | 18.9      | 7.03                          | 18.9      | 1.00                                                     |

AUC<sub>0-∞</sub>, area under the plasma concentration-time curve from time 0 extrapolated to infinity; AUC<sub>0-24</sub>, area under the plasma concentration-time curve from time 0 to 24 h post dose; C<sub>max</sub>, maximum observed plasma concentration; CV, arithmetic coefficient of variation; t<sub>max</sub>, time from dosing until maximum observed concentration is reached in plasma; t<sub>1/2</sub>, terminal half-life in plasma. For AUC<sub>0-∞</sub>, AUC<sub>0-24</sub>, C<sub>max</sub>, and t<sub>1/2</sub>, the arithmetic mean and %CV are given. \*For t<sub>max</sub>, the median and range are given (instead of mean and %CV). <sup>†</sup>Main analysis vs sensitivity analysis ratio not calculated for t<sub>max</sub>. The main analysis was based on the complete data of all 9 patients in the 5 mg dose group, while the sensitivity analysis was done excluding the 2 abnormally high plasma concentrations at 8 h and 48 h postdose for one patient.
